# Supplementary material
Source: PubMed Central journal article supplement (PMC4334277)

## Supplementary Information

### **The effect of otoconial proteins Fetuin A, osteopontin and otoconin 90 on the nucleation and growth of calcite**

Mina Hong<sup>1,2,3</sup>, K. Trent Moreland<sup>4</sup>, Jiajun Chen<sup>3</sup>, Henry H. Teng<sup>2</sup>, Ruediger Thalmann<sup>4,\*</sup>, and James. J. De Yoreo<sup>1,\*</sup>

<sup>1</sup> Physical Sciences Division, Pacific Northwest National Laboratory, Richland, WA 99352 USA

<sup>2</sup> Department of Chemistry, The George Washington University, Washington, DC 20052 USA

<sup>3</sup> The Molecular Foundry, Lawrence Berkeley National Laboratory, Berkeley, CA 94720 USA

<sup>4</sup> Department of Otolaryngology-Head and Neck Surgery, Washington University in St. Louis, St. Louis, MO 63110 USA

\*Corresponding authors email: [james.deyoreo@pnl.gov](mailto:james.deyoreo@pnl.gov) and [thalmannr@ent.wustl.edu](mailto:thalmannr@ent.wustl.edu)

Fig. S1 - AFM image of bare mica surface for comparison with protein films in Fig. 4.

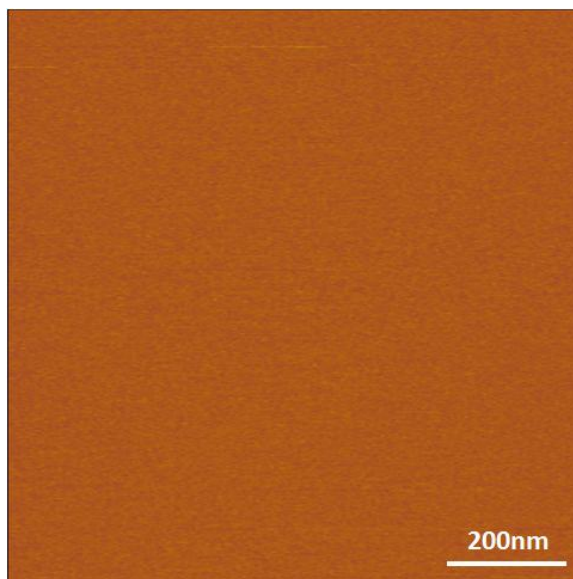

Fig. S2 - Time sequence of optical images showing dependence of nucleation density on time for OPN at  $\sigma = 5.09$ .

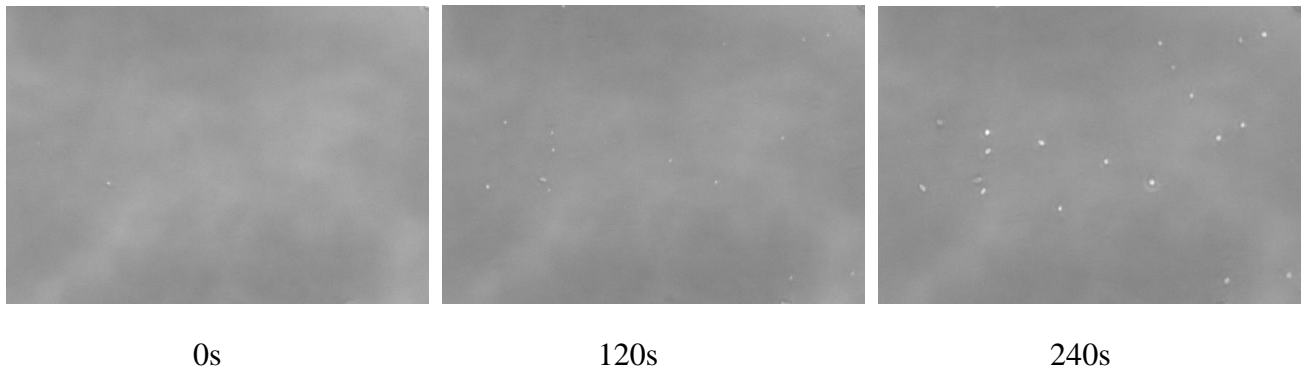

Fig. S3 - Plot showing number density of nuclei vs. time for Fetuin at the indicated values of  $\sigma$ .

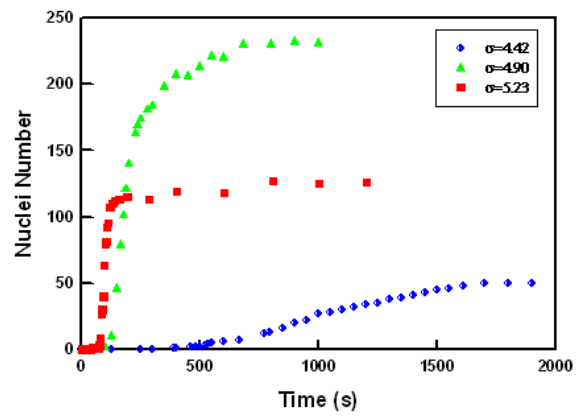

Supplement: cg501001r_si_001.pdf [file cg501001r_si_001.pdf]
